## RESEARCH ARTICLE

# Suicide and sudden violent death among young people: Two sides of the same coin?

Annelie Werbart Törnblom<sup>1</sup>\*, Andrzej Werbart<sup>2</sup>, Kimmo Sorjonen<sup>3</sup>, Bo Runeson<sup>4</sup>

**1** Department of Women's and Children's Health, Karolinska Institutet (KI), Stockholm, Sweden, **2** Department of Psychology, Stockholm University, Stockholm, Sweden, **3** Division of Psychology, Department of Clinical Neuroscience, Karolinska Institutet (KI), Stockholm, Sweden, **4** Department of Clinical Neuroscience, Centre for Psychiatry Research, Karolinska Institutet (KI), Stockholm County Council, Stockholm, Sweden

✉ These authors contributed equally to this work.

\* [annelie.tornblom@ki.se](mailto:annelie.tornblom@ki.se)

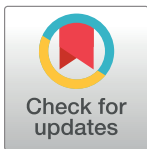

## Abstract

The aim of the present study was to compare risk factors for death by suicide and sudden violent death (SVD) among young people aged 10–25 years. Two target samples, 63 consecutive cases of youth suicide and 62 cases of SVD, were compared on potential risk factors differentiating the two groups from 104 controls. Data on psychiatric diagnoses, psychosocial factors, adverse childhood experiences, stressful life events, and coping strategies were collected in psychological autopsy interviews. Distinguishing for the suicide group was lower frequency of living in a steady relationship, adult psychiatric care, depression, autism spectrum disorder, being sexually assaulted, higher frequency of recent stressful life events, and lowest levels of adaptive coping. Distinguishing for the SVD group was a predominance of males, lower elementary school results, abuse of psychoactive drugs, being investigated or sentenced for criminal acts, conduct disorder or antisocial personality disorder. Common risk factors for both kinds of premature unnatural death included lower educational level, absence of work or studies, different forms of addiction, child and adolescent psychiatric care, borderline personality disorder, adverse childhood experiences, and less adaptive coping. Accordingly, there is a common ground of vulnerabilities, early adversities, and recent strains in life for both forms of premature death, but also substantial differences between these contrasting lethal developments. Prevention of both suicide and SVD should focus on adverse childhood experiences, learning difficulties, meaningful occupation, more adaptive coping, addiction, and treatment of borderline personality disorder. Suicide prevention should comprise promotion of adaptive stress management skills, depression prevention and treatment, and paying attention to young people with autism. SVD prevention should involve early response to learning difficulties, abuse of psychoactive drugs and delinquent behavior, and treatment of conduct disorder and antisocial personality disorder.

## OPEN ACCESS

**Citation:** Werbart Törnblom A, Werbart A, Sorjonen K, Runeson B (2024) Suicide and sudden violent death among young people: Two sides of the same coin? PLoS ONE 19(12): e0313673. <https://doi.org/10.1371/journal.pone.0313673>

**Editor:** Francesco Lupariello, Università degli Studi di Torino: Università degli Studi di Torino, ITALY

**Received:** June 23, 2024

**Accepted:** October 30, 2024

**Published:** December 4, 2024

**Copyright:** © 2024 Werbart Törnblom et al. This is an open access article distributed under the terms of the [Creative Commons Attribution License](https://creativecommons.org/licenses/by/4.0/), which permits unrestricted use, distribution, and reproduction in any medium, provided the original author and source are credited.

**Data Availability Statement:** The anonymized dataset is now uploaded to the public repository Open Science Framework, <https://osf.io/uk3d8/>.

**Funding:** The author(s) received no specific funding for this work.

**Competing interests:** The authors have declared that no competing interests exist.

## Introduction

Suicide and different forms of sudden violent death (SVD) are the most common causes of death among young people worldwide. The phrase “young people,” the target group for our investigation, is generally used in Sweden and the Anglo-Saxon countries as a generic term for children, adolescents, and young adults. To better understand young people who kill themselves or expose themselves to risks resulting in SVD, we need to know more about the interplay between adverse life events, both in the far past and present, vulnerability factors, and coping deficits that may result in such lethal outcomes.

Suicide is defined by the World Health Organization [1] as “the act of deliberately killing oneself,” and a suicide attempt as “any non-fatal suicidal behaviour and refers to intentional self-inflicted poisoning, injury or self-harm which may or may not have a fatal intent or outcome.” The report warns that it can be difficult to distinguish between self-harm with or without suicidal intent, suggesting complexities in demarcating suicide and SVD.

In psychological terms, the process behind overt suicide and other forms of self-destructive behavior is often interpreted as hostile impulses winning over self-protecting forces. For example, Menninger [2] regarded self-destructive acts as inwards-directed aggressiveness. Furthermore, he described abortive, distorted, or attenuated forms of “latent suicide” as result of indirect or incomplete self-destructive behavior, such as addiction or accidents. According to Goldblatt’s [3] more recent psychoanalytic perspective, suicide takes place in the interpersonal and intrapsychic context of unbearable hostility towards the self. Accordingly, a French prospective epidemiological cohort study [4] found that increased risk of suicide is related to cognitive rather than behavioral hostility. The currently often cited Columbia—Suicide Severity Rating Scale (C-SSRS) [5] includes a definition of actual attempt, interrupted attempt, aborted or self-interrupted attempt or preparatory act or behavior to define different levels of suicidal behavior. Accordingly, several authors [6, 7] described a continuum of self-destructive behavior among younger age groups from covert expressions to overt suicidal behavior.

According to current reviews, common risk factors for suicide from childhood to young adulthood include genetic and epigenetic factors, early life adversities, lack of social support, life events, access to lethal means, effects of the media, severe mental illness, depression, personality disorder, substance misuse, economic factors, and physical health problems [8], as well as history of suicidal behavior and psychiatric care [9–11]. A systematic review [12] found evidence for an association between life stressors, particularly interpersonal stressors, and death by suicide. As summarized in an overview of psychological models of suicide [13], some models focus on vulnerability factors, such as “impulsive aggressive tendencies, maladaptive cognitive styles, problem solving deficits, attention bias, over-general memory, and acquired capability for self-harm,” whereas other models emphasize the role of stressful life events, leading to “mental pain, hopelessness, entrapment, and interpersonal distress” (p. 306). However, few theoretical models and empirical studies try to integrate these two clusters of factors or grasp the interactions between different factors.

Major risk factors for SVD among young people, identified in several studies [14–17], include being of male sex, antisocial personality disorder, criminality, alcohol and drug abuse, adverse family psychosocial characteristics, as well as aggressive feelings and acts against oneself and others, health-compromising behavior, and risk-taking behavior. Thus, there are some similarities but also several differences between risk factors for suicide and SVD among youth. Accordingly, the two-stage model of suicide and violence [13] assumes that both suicide and SVD are expressions of the same underlying aggressive impulse. Hence, other intervening variables determine whether the aggression is directed inward or expressed in outward-directed behavior.

Major protective factors for youth suicidality, found in empirical studies [18, 19] and reviews [20, 21], include parental presence, connectedness to parents and peers, belongingness to community and social institutions, positive connection to school and academic achievement, social competence, coping and problem-solving skills, contacts with caregivers, and effective mental health care. Much less is known about protective factors against SVD. A systematic review [22] found that adaptive coping has a protective function against stress and is related to well-being in the transition to adulthood. Thus, adequate coping skills may be expected to have protective function against both suicide and SVD.

In a previous study [23], we examined associations between stressful life events and coping strategies in cases of youth suicide and in cases of youth SVD, as compared to general population control cases. We found that between-group differences in coping were partly accounted for by differences in negative life events, early and later in life. In the present study we explore the assumption that there may be both common factors, distinguishing children, adolescents, and young adults who died by suicide or SVD from the general population, and specific factors that are unique for the two groups, comparing the two target groups on variables significantly distinguishing them from control cases. A review [24] found that the term “sudden violent death” usually includes death by suicide, accident, homicide, or overdose. In the present study, suicide is defined as the act of deliberately killing oneself, and SVD as unintentional injury-related (that is, non-suicidal) death, which may still have occurred due to an underlying, hidden intention to die. As far as we know, there is a scarcity of studies and lack of reviews exploring common paths and dividing developments for suicide and SVD among children and young people.

## Methods

### Study design and sample

The present study is based on archival interview data collected from May 28, 2001, to January 28, 2008, in an investigation of suicide and SVD (murder, accident, unclear accident) up to the age of 25 years in Stockholm County, Sweden, and including a control group. Consequently, the sample and some of the data presented here have already been used in previous publications [23, 25]. The project was approved by the Regional Ethical Review Board, Karolinska Institutet, Stockholm (reference number 96–204 and 2005/530-32), and for the control group also the Swedish State Personal Address Register (reference number 2004/0146). All informants (parents and relatives of the deceased, as well as all participants in the control group and their parents) gave written informed consent.

In order to compute the required sample size a priori power analysis was conducted applying G\*Power [26]. For a one-way ANOVA with three groups, 0.05 alpha level, effect size  $f = 0.25$  (medium effect size corresponding to Cohen's  $d = 0.5$ ), and power 0.8, the required sample size per group is 53. With 60 persons per group, the achieved power will be 0.85.

Consecutive cases of non-natural death among children, adolescents, and young adults were identified at the Department of Forensic Medicine in Stockholm, which is responsible for all forensic autopsies in the Stockholm Region. Information on causes of death was based on autopsy protocols and police reports. Consecutive cases of suicide were collected from October 6, 2000, through December 30, 2004, and the consecutive cases of SVD from October 1, 2000, through September 11, 2002. Such a long time was required to achieve the target number of at least 60 cases in both groups. The control cases were collected from a randomized sample obtained from the population registry in Stockholm County (data collected from January 18, 2006, through January 28, 2008). Looking for risk factors for suicide and SVD, the control group was originally matched with the two target groups taken together on two variables:

gender and age, according to a review [27] the most common procedure in psychological autopsy studies. No other matching criteria were used, as we wanted to include a wide range of potential risk factors, such as strains in life and socio-demographic characteristics.

In the present study, the anonymized database was accessed from July 6, 2019. All interview data were collected by the first author who unavoidably had access to information that could identify individual participants during the data collection. None of the other authors had access to such information during or after data collection.

Two target samples and a control group were included (for sociodemographic characteristics and study variables, see Table 1). Of the 63 cases of suicide (aged 12–25 years), 41 were males and 22 females. Seven of the cases of suicide (11%) were younger than 18 years. Of the 62 cases of SVD (aged 10–25 years), 55 were males and 7 females. Ten of the cases of SVD (16%) were younger than 18 years. Both target groups, taken together, included 125 cases of premature unnatural death; 96 males (77%) aged 10–25 years ( $M = 21.0$ ;  $SD = 3.2$ ;  $Md = 22$ ) and 29 females (23%) aged 14–24 years ( $M = 19.8$ ;  $SD = 3.0$ ;  $Md = 22$ ). This can be compared with the 104 control cases, of which 76 were males (73%) aged 10–25 years ( $M = 20.7$ ;  $SD = 3.4$ ;  $Md = 21$ ) and 28 were females (27%) aged 14–24 years ( $M = 19.7$ ;  $SD = 3.0$ ;  $Md = 20$ ). In all, 229 families took part in the study (among the control families, the individual young person was included in the interview).

### Psychological autopsy interviews

In the suicide group, the interviews were conducted three to 13 months postmortem and in the SVD group three to 16 months postmortem. At least one interview per case was performed, preferably with the parents of the dead person, but siblings and occasionally other relatives could replace a non-participating parent, and in the control group also with the young person (105 interviews in the suicide group, 91 interviews in the SVD group, and 240 interviews in the control group). The semi-structured interview protocol followed basic procedures for psychological autopsy studies, investigating the background of suicide, the person's state of mind, mental and physical health, personality characteristics, adverse life experiences, socioeconomic and educational background, and integration in the society.

### Variables of interest

**Psychiatric diagnoses.** The interviews comprised criteria for the following psychiatric diagnoses according to DSM-IV-TR [28]: Autistic Disorder (AD), Attention Deficit Hyperactivity Disorder (ADHD), Conduct Disorder (CD), Oppositional Defiant Disorder (ODD), depression spectrum disorder (Mood Disorder, Major Depressive Disorder, or Depressive Episode), Borderline Personality Disorder (BPD), and Antisocial Personality Disorder (APD).

**Strains in life.** Early strains in life were operationalized in terms of Adverse Childhood Experiences (ACE). This concept comes from the Centers for Disease Control and Prevention (CDC) Kaiser ACE Study, originally reported in 1998 [29]. The 10 ACEs measured in the present study were identical to those used in most recent ACEs studies [30], namely: abuse variables (emotional and verbal abuse, physical abuse, sexual abuse), neglect variables (emotional neglect, physical neglect), and household dysfunction variables (witnessing a mother being abused, household substance abuse, mental illness or depression in household, parental separation or divorce, imprisoned household member).

Recent strains in life were assessed in terms of stressful life events in the previous year, using all relevant interview information and scored following a modified non-adult version of the Holmes and Rahe Social Readjustment Rating Scale (SRRS) [31]. To the original 39 SRRS items we added these six age-relevant items: imprisonment, exposed to violence, moving away

**Table 1. Sociodemographic, psychosocial and psychiatric data, and univariate effects of the potential risk factors on the dependent variable.**

| Variable                                                 | Suicide            |           | Sudden violent death |           | Suicide vs. sudden violent death |        |         |       |
|----------------------------------------------------------|--------------------|-----------|----------------------|-----------|----------------------------------|--------|---------|-------|
|                                                          | N = 63             | %         | N = 62               | %         | OR                               | 95% CI | p-value |       |
| Gender (female)                                          | 22                 | 34.9      | 7                    | 11.3      | 4.216                            | 1.644  | 10.812  | 0.003 |
| Males age                                                | M = 21.4 (12–25)   | SD = 2.5  | M = 20.7 (10–25)     | SD = 3.7  |                                  |        |         |       |
| Females age                                              | M = 19.7 (14–24)   | SD = 3.3  | M = 20.0 (17–22)     | SD = 1.9  |                                  |        |         |       |
| Mother’s age at the child’s birth                        | M = 29.7 (16–42)   | SD = 5.8  | M = 27.1* (17–39)    | SD = 5.5  | 1.084                            | 1.016  | 1.157   | 0.015 |
| Elementary school, <sup>1</sup> average or higher grades | 51 <sup>4</sup>    | 83.6      | 43***                | 69.4      | 3.813                            | 1.603  | 9.071   | 0.002 |
| Upper secondary school, average or higher grades         | 31*** <sup>7</sup> | 53.4      | 28*** <sup>8</sup>   | 50.0      | 1.148                            | 0.550  | 2.395   | 0.713 |
| Education level <sup>2</sup>                             | ***                |           | ***                  |           |                                  |        |         | 0.196 |
| Elementary school or less                                | 33                 | 52.4      | 38                   | 61.3      |                                  |        |         |       |
| Upper secondary school <sup>2</sup>                      | 21*                | 33.3      | 19**                 | 30.6      | 1.273                            | 0.586  | 2.766   | 0.543 |
| Post-secondary or university <sup>2</sup>                | 6***               | 9.5       | 5***                 | 8.1       | 1.382                            | 0.386  | 4.946   | 0.619 |
| University degree <sup>2</sup>                           | 3                  | 4.8       | 0                    | 0.0       | NA                               | 0.000  | NA      | 0.990 |
| Mother’s educational level <sup>2</sup>                  |                    |           | **                   |           |                                  |        |         | 0.062 |
| Elementary school or less                                | 11                 | 17.5      | 12 <sup>4</sup>      | 19.7      |                                  |        |         |       |
| Upper secondary school <sup>2</sup>                      | 18                 | 28.6      | 27 <sup>4</sup>      | 44.3      | 0.727                            | 0.264  | 2.002   | 0.538 |
| Post-secondary or university <sup>2</sup>                | 8                  | 12.7      | 10 <sup>4</sup>      | 16.4      | 0.873                            | 0.253  | 3.011   | 0.829 |
| University degree <sup>2</sup>                           | 26                 | 41.3      | 12** <sup>4</sup>    | 19.7      | 2.364                            | 0.814  | 6.866   | 0.114 |
| Father’s educational level <sup>2</sup>                  |                    |           |                      |           |                                  |        |         | 0.436 |
| Elementary school or less                                | 22                 | 34.9      | 16 <sup>4</sup>      | 26.2      |                                  |        |         |       |
| Upper secondary school <sup>2</sup>                      | 12*                | 19.0      | 19 <sup>4</sup>      | 31.1      | 0.459                            | 0.174  | 1.209   | 0.115 |
| Post-secondary or university <sup>2</sup>                | 6*                 | 9.5       | 6 <sup>4</sup>       | 9.8       | 0.727                            | 0.198  | 2.674   | 0.632 |
| University degree <sup>2</sup>                           | 23                 | 36.5      | 20 <sup>4</sup>      | 32.8      | 0.836                            | 0.347  | 2.016   | 0.691 |
| Occupation (studies or work; no/yes)                     | 24/39**            | 38.1/61.9 | 19/43***             | 30.6/69.4 | 0.768                            | 0.365  | 1.618   | 0.488 |
| Steady relationship at death                             | 18*                | 28.6      | 35                   | 56.5      | 0.309                            | 0.147  | 0.648   | 0.002 |
| Addiction (no/yes)                                       | 32/31***           | 50.8/49.2 | 36/26***             | 58.1/41.9 | 1.341                            | 0.662  | 2.717   | 0.415 |
| Alcohol abuse                                            | 11**               | 17.5      | 8*                   | 12.9      | 1.428                            | 0.532  | 3.832   | 0.479 |
| Substance abuse                                          | 20***              | 31.7      | 21***                | 33.9      | 0.908                            | 0.430  | 1.917   | 0.800 |
| Abuse of anabolic steroids                               | 6                  | 9.5       | 9                    | 14.5      | 0.620                            | 0.207  | 1.860   | 0.394 |
| Abuse of psychoactive drugs                              | 6*                 | 9.5       | 20***                | 32.3      | 0.221                            | 0.082  | 0.598   | 0.003 |
| Alcohol or drugs at the time of death                    | 37 <sup>4</sup>    | 60.7      | 26 <sup>4</sup>      | 42.6      | 2.075                            | 1.008  | 4.273   | 0.048 |
| Mother’s addiction (no/yes)                              | 60/3               | 95.2/4.8  | 57/5                 | 91.9/8.5  | 0.570                            | 0.130  | 2.495   | 0.456 |
| Father’s addiction (no/yes)                              | 43/10**            | 68.3/31.7 | 46/16*               | 74.2/25.8 | 1.337                            | 0.614  | 2.911   | 0.464 |
| Investigated or sentenced for criminal acts              | 18                 | 28.6      | 36***                | 58.1      | 0.267                            | 0.126  | 0.566   | 0.001 |
| Father’s criminality (investigated or sentenced)         | 3                  | 4.8       | 3                    | 4.8       | 0.983                            | 0.191  | 5.070   | 0.984 |
| Psychiatric care (no/yes)                                | 18/45**            | 28.6/71.4 | 26/36                | 41.9/58.1 | 1.806                            | 0.858  | 3.799   | 0.119 |
| Outpatient child and adolescent psychiatry               | 28                 | 44.4      | 30                   | 48.4      | 0.853                            | 0.422  | 1.725   | 0.659 |
| Inpatient child and adolescent psychiatry                | 6*                 | 9.5       | 8*                   | 12.9      | 0.711                            | 0.231  | 2.182   | 0.551 |
| Outpatient adult psychiatric care                        | 35***              | 55.6      | 17                   | 27.4      | 3.309                            | 1.567  | 6.985   | 0.002 |
| Inpatient adult psychiatric care                         | 25***              | 39.7      | 11**                 | 17.7      | 3.050                            | 1.338  | 6.955   | 0.008 |
| Admission to treatment unit for young people             | 9**                | 14.3      | 12***                | 19.4      | 0.694                            | 0.270  | 1.788   | 0.450 |
| Mother’s psychiatric care (no/yes)                       | 51/12              | 81.0/19.0 | 49/13                | 79.0/21.0 | 0.887                            | 0.369  | 2.132   | 0.789 |
| Mother’s outpatient psychiatric care                     | 10                 | 15.9      | 12                   | 19.4      | 0.786                            | 0.312  | 1.980   | 0.610 |
| Mother’s inpatient psychiatric care                      | 2                  | 3.2       | 1                    | 1.6       | 2.000                            | 0.177  | 22.640  | 0.576 |
| Father’s psychiatric care (no/yes)                       | 48/15              | 76.2/23.8 | 54/8                 | 87.1/12.9 | 2.109                            | 0.822  | 5.411   | 0.120 |
| Father’s outpatient psychiatric care                     | 13                 | 20.6      | 7                    | 11.3      | 2.043                            | 0.755  | 5.528   | 0.160 |
| Father’s inpatient psychiatric care                      | 4                  | 6.3       | 2                    | 3.2       | 2.034                            | 0.359  | 11.530  | 0.423 |
| Depression spectrum disorder                             | 42***              | 66.7      | 22                   | 35.5      | 3.636                            | 1.738  | 7.608   | 0.001 |

(Continued)

Table 1. (Continued)

| Variable                                        | Suicide            |            | Sudden violent death |            | Suicide vs. sudden violent death |        |         |       |
|-------------------------------------------------|--------------------|------------|----------------------|------------|----------------------------------|--------|---------|-------|
|                                                 | N = 63             | %          | N = 62               | %          | OR                               | 95% CI | p-value |       |
| Autism spectrum disorder (ASD)                  | 11*                | 17.5       | 3                    | 4.8        | 4.090                            | 1.081  | 15.469  | 0.038 |
| Autistic disorder (AD)                          | 4                  | 6.3        | 1                    | 1.6        | 4.068                            | 0.442  | 37.477  | 0.216 |
| Attention deficit hyperactivity disorder (ADHD) | 13                 | 20.6       | 19                   | 30.6       | 0.588                            | 0.261  | 1.329   | 0.202 |
| Conduct disorder (CD)                           | 9                  | 14.3       | 19*                  | 30.6       | 0.377                            | 0.155  | 0.917   | 0.031 |
| Oppositional defiant disorder (ODD)             | 13                 | 20.6       | 12                   | 19.4       | 1.083                            | 0.451  | 2.604   | 0.858 |
| Borderline personality disorder (BPD)           | 25*** <sup>5</sup> | 43.9       | 21*** <sup>6</sup>   | 40.4       | 1.153                            | 0.538  | 2.471   | 0.714 |
| Antisocial personality disorder (APD)           | 7 <sup>5</sup>     | 12.3       | 19*** <sup>6</sup>   | 36.5       | 0.243                            | 0.092  | 0.643   | 0.004 |
| Divorced or separated parents                   | 38*                | 60.3       | 37                   | 59.7       | 1.027                            | 0.502  | 2.101   | 0.942 |
| Dead parent <sup>3</sup>                        |                    |            |                      |            |                                  |        |         | 0.062 |
| Dead mother                                     | 3                  | 4.8        | 1                    | 1.6        | 4.049                            | 0.805  | 20.369  | 0.090 |
| Dead father                                     | 7                  | 11.1       | 2                    | 3.2        | 3.471                            | 0.350  | 34.410  | 0.288 |
| Dead both parents                               | 2                  | 3.2        | 0                    | 0.0        | NA                               | 0.000  | NA      | 0.988 |
| Adverse childhood experiences (ACE)             | M = 2.16***        | SD = 1.55  | M = 1.82***          | SD = 1.52  | 1.156                            | 0.916  | 1.458   | 0.222 |
| Being bullied                                   | 28                 | 44.4       | 15***                | 24.2       | 2.507                            | 1.167  | 5.385   | 0.019 |
| Being sexually assaulted                        | 13**               | 20.6       | 1                    | 1.6        | 15.340                           | 1.938  | 121.395 | 0.010 |
| Foster-home placement                           | 4                  | 6.3        | 6                    | 9.7        | 0.633                            | 0.170  | 2.361   | 0.496 |
| Suicide attempt among relatives                 | 20                 | 31.7       | 18                   | 29.0       | 1.111                            | 0.517  | 2.386   | 0.787 |
| Death by suicide among relatives                | 22                 | 34.9       | 11                   | 17.7       | 2.439                            | 1.060  | 5.612   | 0.036 |
| Recent death close to the young person (yes)    | 48                 | 76.2       | 36                   | 58.1       | 2.311                            | 1.072  | 4.984   | 0.033 |
| Stressful life events previous year (SLY; yes)  | 62                 | 98.4       | 53                   | 85.5       | 10.528                           | 1.292  | 85.816  | 0.028 |
| Severity of stressful life events (SRI)         | M = 148.14***      | SD = 56.33 | M = 111.23***        | SD = 58.87 | 1.011                            | 1.005  | 1.018   | 0.001 |
| Number of stressful life events (LEI)           | M = 2.84***        | SD = 1.05  | M = 2.10***          | SD = 1.07  | 1.965                            | 1.352  | 2.856   | 0.000 |
| Planful Problem-Solving                         | M = -0.56***       | SD = 1.03  | M = -0.08*           | SD = 1.07  | 0.647                            | 0.449  | 0.932   | 0.019 |
| Seeking Social Support                          | M = 0.29*          | SD = 1.01  | M = -0.03            | SD = 1.03  | 1.367                            | 0.940  | 1.879   | 0.102 |
| Escape-Avoidance                                | M = 0.55***        | SD = 0.82  | M = 0.24***          | SD = 1.09  | 1.392                            | 0.940  | 2.061   | 0.098 |
| Confrontive Coping                              | M = 0.15*          | SD = 1.07  | M = 0.28**           | SD = 1.14  | 0.893                            | 0.638  | 1.250   | 0.510 |

\*\*\*  $p < .001$ \*\*  $p < .01$ \*  $p < .05$  in comparison to the control group (yellow highlighted).

Note. <sup>1</sup> reference category "average results"; <sup>2</sup> reference category "elementary school or less"; <sup>3</sup> reference category "none"; <sup>4</sup> N = 61 owing to missing data; <sup>5</sup> N = 57 age >18 years; <sup>6</sup> N = 52 age >18 years; <sup>7</sup> N = 58; <sup>8</sup> N = 56; NA = not available due to too low frequency in at least one of the groups.

<https://doi.org/10.1371/journal.pone.0313673.t001>

from home, increase in arguments with parents or partner, economic difficulties, and starting or interrupting work or studies. Each of the 45 items was ascribed a Life Change Unit (LCU) [32] on a 100-point scale. The *Social Readjustment Index* (SRI) is the sum of all LCU scores. We also calculated the *Life Event Index* (LEI) [33], which is simply the total number of stressful life events for each case.

**Ways of coping.** The interview protocol included the 24-item Shortened Ways of Coping Questionnaire (WCQ), one of the most frequently used coping scales [34]. In the present study, each yes-no response to the 24 WCQ items in each case was based on an aggregated yes-no response from all responders in each case. Factor analysis of the WCQ responses in 229 cases [23] gave a four-factor solution: Planful Problem-Solving, Escape-Avoidance, Seeking Social Support, and Confrontive Coping (aggressive, hostile acting-out), together explaining 54% of the variance in the material.

## Data analysis

In the preliminary step of the statistical analysis, univariate effects of demographic and potential risk factors on the dependent variables were tested separately for cases of suicide–control cases and cases of SVD–control cases, using logistic regression. Comparisons of the suicide and SVD groups with general controls were reported in our previous study [18], based on ANOVA and Tukey's honestly significant difference (HSD) post-hoc test, and were now recalculated applying the same statistical method for all potential risk factors, i.e., logistic regression. The present study adds a direct comparison between the suicide and SVD groups among variables significantly different from the control cases. A third logistic regression analysis was calculated to test univariate effects of demographic and risk factors on the dichotomous outcome of having died by suicide, rather than by SVD. Following this, we looked for factors similar for the cases of suicide and cases of SVD, but significantly different from the control cases. Lastly, logistic regression was also used to calculate coping by life events interaction effects on having died by suicide. Cause of death by coping (life events) interaction effects on life events (coping) were calculated with linear regression analysis.

## Results

Approximately half of those who died by suicide (50.8%; 54.5% females and 48.8% males) had made previous suicide attempts, whereas none of the females and only 10.9% of the males attempted suicide in the SVD group. Looking at distinguishing risk factors for the two target groups, identified in univariate analyses, we found 21 significant differences on variables significantly different from the control cases (yellow-highlighted in Table 1). Distinguishing for the suicide group was lower frequency of living in a steady relationship (28.6%), adult outpatient (55.6%) and inpatient (39.7%) psychiatric care, depression (66.7%), autism spectrum disorder (17.5%), being sexually assaulted (20.6%), higher frequency of recent stressful life events (98.4%), and lower levels of Planful Problem-Solving ( $M = -0.56$ ). Distinguishing for the SVD group was a predominance of males (88.7%), younger mother ( $M = 27.1$ ), lower elementary school results (30.6%), abuse of psychoactive drugs (32.3%), being investigated or sentenced for criminal acts (58.1%), conduct disorder (30.6%) or antisocial personality disorder (36.5%).

Looking at similarities between the suicide group and the SVD group, we found 16 risk factors common for both groups, but distinguishing both of them from the control group (yellow-highlighted in Table 1). Common risk factors included lower educational level, absence of work or studies, different forms of addiction, child and adolescent psychiatric care, borderline personality disorder, adverse childhood experiences, low levels of Planful Problem-Solving, and high levels of Escape-Avoidance and Confrontive Coping.

In regression analyses with group as a dichotomous predictor there was a significant difference between the suicide and the SVD group in Planful Problem-Solving ( $b = 0.416$ ,  $p = 0.026$ ) but not on the other three coping factors ( $p = 0.058$ ,  $0.168$ , and  $0.523$  for Escape-Avoidance, Seeking Social Support, and Confrontive Coping, respectively). Taken together, these analyses indicate that the suicide group had lower levels of the more adaptive coping strategy Planful Problem-Solving than the SVD group, but both groups had similarly high levels of the more maladaptive coping strategies (Escape-Avoidance and Confrontive Coping).

Differences in the association between coping and life events between the two groups were calculated through interaction effects (group  $\times$  coping interaction effects on life events, and group  $\times$  life events interaction effects on coping). We also calculated life events by coping interaction effects on group membership. None of these associations was significant, i.e., the association between coping and life events did not differ between the suicide and the SVD groups, and the association between group membership and coping (life events) did not differ

depending on degree of life events (coping). Accordingly, pair-wise comparisons with the control group showed similar patterns for both target groups, distinguishing them from the control group. Differences in Planful Problem-Solving could be accounted to some degree by differences in ACEs, indicating similar mediated effects of ACE on the low levels of the more adaptive coping strategy Planful Problem-Solving in the suicide and the SVD group.

## Discussion

Our findings are congruent with several psychological theories of suicide [13]. The examination of coping strategies confirmed social problem-solving vulnerability both in the suicide group and in the SVD group, consistent with the theory of *cognitive rigidity in problem-solving* [35]. The examination of risk factors suggested that psychiatric illness per se might constitute a severe strain in life but lead to suicide mainly if combined with other vulnerability factors, as previously postulated by the *clinical-biological model of suicide* [36]. According to this model, a common trait factor associated with suicidality is responding to stressful life experiences with hostility and aggression [21]. The present study showed that this factor is common for cases of suicide and SVD but is more prominent in cases of SVD. Thus, suicide and SVD might be consequences of underlying aggressive impulses that, in combination with other risk factors, determine whether the aggression is directed toward others or toward oneself (*two-stage model of outward or inward directed aggression*) [37, 38].

To summarize, the answer to our question “Two sides of the same coin?” must be: only partially. There are several common risk factors for both groups, distinguishing them from the control cases. But there are also several significant differences between the cases of suicide and SVD. In other words, there is a common ground of adverse childhood experiences, other vulnerabilities and strains in life, lower educational level and lack of work or studies, addiction, as well as less adaptive coping for both forms of premature violent death, but there is also a substantial divide for the two contrasting developments ending with suicide or with SVD, respectively. The pathway to death by suicide includes lack of a steady relationship, sexual traumatization, depression, autism, being psychiatric out- or inpatient, recent stressors in everyday life, lowest levels of adaptive coping, and use of alcohol and drugs in connection with suicide. The pathway to SVD includes male gender, younger mother, poor elementary education, acting out in form of criminal behavior, conduct disorder and antisocial personality disorder, together contributing to risk-taking behavior. The dividing line between the two pathways to premature unnatural death can be interpreted in terms of inward or outward directed aggression and internalizing versus externalizing psychopathology (Fig 1). However, it has to be noted that the path to sudden violent death seems to show some similarities to a third path: to destructivity and violence in interpersonal and intergroup relationships, criminal acts, and hurting others [39]. For example, young adult violent offenders might direct aggressive behaviors not only toward other people, but also toward themselves [40].

In the present study, approximately 29% of those who died by suicide and 42% of those who died a SVD, respectively, had never sought or never received any help from mental health services. This might suggest barriers to help-seeking among suicidal decedents, studied in a systematic review [41], and even higher barriers in the SVD group, probably due to the marked male predominance in this group, more of outward directed aggression and externalizing psychopathology (Fig 1). However, it should be noted that barriers against help-seeking are not only related to the young persons themselves but also include professionals, organization of school system, labor market, and routine mental health care.

On a theoretical level, the common feature of paths to suicide and to SVD is the existence of destructive and self-destructive processes. Based on our findings (Fig 1), common goals for



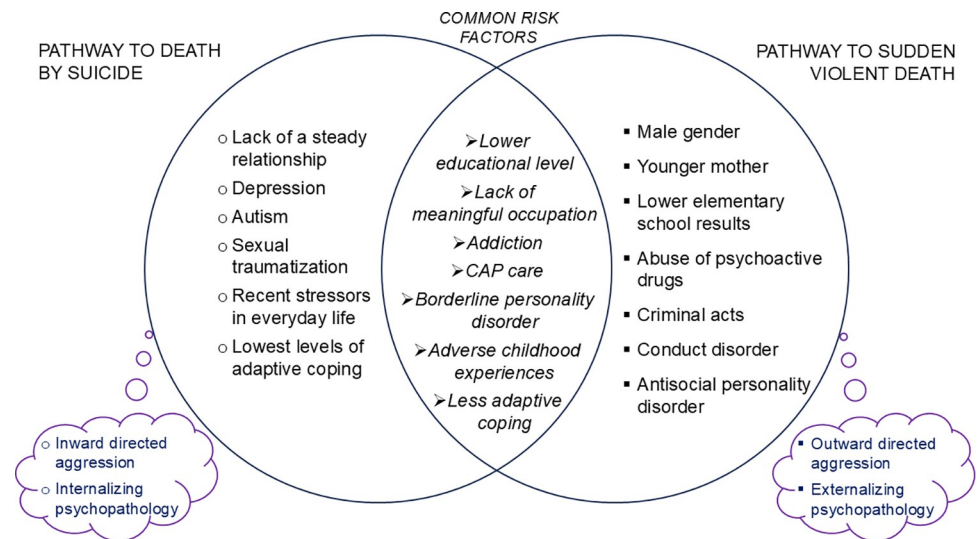

**Fig 1. Common risk factors and distinct pathways to death by suicide and to SVD.**

<https://doi.org/10.1371/journal.pone.0313673.g001>

prevention of both suicide and SVD should include focus on consequences of adverse childhood experiences; facilitating school learning and finding a job or alternative forms of meaningful occupation; promoting more adaptive coping strategies; addiction prevention and treatment; as well as routine follow-up of child and adolescent psychiatric contacts. Specific targets for suicide prevention should comprise focus on young people with lowest levels of adaptive coping, depression prevention and treatment, and paying attention to young people with autism. Specific targets for prevention of SVD should involve early recognition and response to learning difficulties, abuse of psychoactive drugs and delinquent behavior, paying attention to expressions of outward directed aggression, and effective treatment of conduct disorder and antisocial personality disorder. Ultimately, prevention of suicide and other forms of life-threatening behavior among young people may be facilitated by social, educational, and therapeutic interventions addressing feelings of powerlessness and loss of control over their lives, hostile contempt, violence in interpersonal and intergroup relationships, and externalization and projection onto others of own shortcomings and weaknesses.

### Strengths and limitations

The main assets of the present study include the use of multiple informants, and the focus on the partially common path and dividing developments for the two contrasting forms of premature unnatural death, as compared to living controls. Furthermore, the relatively low attrition (16–18%) may contribute to high representativity of our results. This should be compared with the usual dropout rate of 40–50% for psychological autopsy studies, reported in a review of methodological issues [42].

The most serious limitation of our study is the use of almost 20 years old archival data. Although we can hypothesize that some, if not most, of the risk factors associated with suicide and SVD, are still the same, including the use of less adaptive coping strategies, other factors might have been influenced in this period by, for example increased suicide awareness, greater focus on prevention, the use of social media and online interventions, experiences from the covid-19 close-down, climate crisis and the war in Europe, etc. This time gap may be a potential source of bias, and our results should be interpreted with caution as an initial exploration of potential similarities and differences between paths to suicide and to SVD. A further

limitation is the wide age span (10–25 years), which includes different stages of the maturation process, and the limited number of cases below 18 years of age. Thus, there is a need of up-to-date replication studies in different sociocultural contexts and age groups.

Parents and other close relatives are usually considered as the most appropriate informants in cases of sudden death among young people, providing their attempts at in-depth understanding of what contributed to the lethal outcome. At the same time, they might not be aware of important information [42]. Another potential source of bias might be the search after meaning, trying to identify, in retrospect, circumstances that could explain the death [11]. The use of multiple informants minimized the risks. On the other hand, the procedure of weighing the informants' answers inevitably involves a risk of subjective judgment. Another potential source of error is the varying number of informants in each case. A potential source of bias is the fact that the cases were deceased whereas the controls were not [27]. In the control group, living controls were included, in addition to their relatives, thus resulting in what Brent [43] called “asymmetry of informants” in psychological autopsy studies.

A further limitation is the large number of statistical comparisons, which increases the risk of type 1 error. However, a more rigorous significance criterion, such as a Bonferroni correction, would increase the risk for an overestimation of similarities between the two target groups, thus yielding incorrect answers to our research questions. Balancing the two risks, we decided to maintain the customary 5% significance level. Nevertheless, the results must be interpreted with caution.

## Implications

As usual, the present study raises new questions. Half of the cases of suicide had made no previous suicide attempt. What is common and what is different about these cases and those with single or multiple previous attempts? One tenth of those who died by SVD had also attempted suicide, which only is slightly more than in the control group. What is common to these cases and cases of death by suicide? Psychological autopsy studies can give us still deeper and highly relevant knowledge, for example of similarities and differences in processes ending in suicide or SVD. However, we also need more extensive and labor-intensive longitudinal research, focusing on interactions between different factors across time and on subgroup differences, including gender, different age groups, privileged and underprivileged housing environment, etc. Another important area of further research is changing the focus from risk factors and destructive processes to protective factors and adequate methods for creating benign circles. Such studies can contribute to more targeted prevention of both suicide and SVD. Furthermore, we urgently need studies of pathways to criminality and violent acts towards others.

## Author Contributions

**Conceptualization:** Annelie Werbart Törnblom, Andrzej Werbart, Kimmo Sorjonen, Bo Runeson.

**Data curation:** Annelie Werbart Törnblom, Andrzej Werbart, Kimmo Sorjonen.

**Formal analysis:** Annelie Werbart Törnblom, Andrzej Werbart, Kimmo Sorjonen.

**Investigation:** Annelie Werbart Törnblom.

**Methodology:** Annelie Werbart Törnblom, Andrzej Werbart, Kimmo Sorjonen, Bo Runeson.

**Project administration:** Annelie Werbart Törnblom.

**Resources:** Annelie Werbart Törnblom, Kimmo Sorjonen, Bo Runeson.

**Software:** Kimmo Sorjonen.

**Supervision:** Andrzej Werbart, Kimmo Sorjonen, Bo Runeson.

**Validation:** Kimmo Sorjonen, Bo Runeson.

**Visualization:** Annelie Werbart Törnblom, Andrzej Werbart.

**Writing – original draft:** Annelie Werbart Törnblom, Andrzej Werbart, Kimmo Sorjonen.

**Writing – review & editing:** Annelie Werbart Törnblom, Andrzej Werbart, Kimmo Sorjonen, Bo Runeson.

## References

1. WHO. Preventing suicide: a global imperative. Geneva, Switzerland: World Health Organization 2014. Available from: <https://www.who.int/publications/item/9789241564779>
2. Menninger KA. Man against himself. Oxford, England: Harcourt, Brace; 1938.
3. Goldblatt MJ. Hostility and suicide: The experience of aggression from within and without. In: Relating to self-harm and suicide: psychoanalytic perspectives on practice, theory and prevention. Briggs S, Lemma A, Crouch W, editors. London, UK: Routledge; 2008. pp. 119–132.
4. Lemogne C, Fossati P, Limosin F, Nabi H, Encrenaz G, Bonenfant S, et al. Cognitive hostility and suicide. *Acta Psychiatr Scand*. 2011; 124:62–69. <https://doi.org/10.1111/j.1600-0447.2010.01658.x> PMID: 21198459
5. Posner K, Brown GK, Stanley B, Brent DA, Yershova KV, Oquendo MA, et al. The Columbia-Suicide Severity Rating Scale: initial validity and internal consistency findings from three multisite studies with adolescents and adults. *Am J Psychiatry*. 2011; 168:1266–1277. <https://doi.org/10.1176/appi.ajp.2011.10111704> PMID: 22193671
6. Frederick CJ. Trends in mental health: self-destructive behavior among younger age groups. *Keynote*. 1976; 4(3):3–5.
7. King RA, Ruchkin VV, Schwab-Stone ME. Suicide and the ‘continuum of adolescent self-destructiveness’: is there a connection? In: King RA, Apter A, editors. *Suicide in children and adolescents*. Cambridge, UK: Cambridge University Press; 2003. pp. 41–62.
8. Fazel S, Runeson B. Suicide. *New Engl J Med*. 2020; 382:266–274. <https://doi.org/10.1056/NEJMra1902944> PMID: 31940700
9. Bilsen J. Suicide and youth: risk factors. *Front Psychiatry*. 2018; 9:540. <https://doi.org/10.3389/fpsy.2018.00540> PMID: 30425663
10. Beautrais AL. Risk factors for suicide and attempted suicide among young people. *Aust N Z J Psychiatry*. 2000; 34:420–36. <https://doi.org/10.1080/j.1440-1614.2000.00691.x> PMID: 10881966
11. Cavanagh JTO, Carson A J, Sharpe M, Lawrie SM. Psychological autopsy studies of suicide: a systematic review. *Psychol Med*. 2003; 33:395–405. <https://doi.org/10.1017/s0033291702006943> PMID: 12701661
12. Liu R. T., & Miller I. Life events and suicidal ideation and behavior: a systematic review. *Clin Psychol Rev*. 2014; 34:181–192. <https://doi.org/10.1016/j.cpr.2014.01.006> PMID: 24534642
13. Barzilay S, Apter A. Psychological models of suicide. *Arch Suicide Res*. 2014; 18:295–312. <https://doi.org/10.1080/13811118.2013.824825> PMID: 24568371
14. Coffey C, Veit F, Cini E, Patton GC, Wolfe R, Moran P. Mortality in young offenders: retrospective cohort study. *BMJ*. 2003; 326.7398:1064. <https://doi.org/10.1136/bmj.326.7398.1064> PMID: 12750207
15. Mattila VM, Pakkari J, Koiusilta L, Nummi T, Kannus P, Rimpelä A. Adolescent health and health behavior as predictors of injury death: a prospective cohort follow-up of 652,530 person-years. *BMC Public Health*. 2008; 8:90–5. <https://doi.org/10.1186/1471-2458-8-90> PMID: 18366651
16. Richardson JB Jr, Brown J, Van Brakle M. Pathways to early violent death: the voices of serious violent youth offenders. *Am J Public Health*. 2013; 103(7):e5–e16. <https://doi.org/10.2105/AJPH.2012.301160> PMID: 23678923
17. Stenbacka M, Jansson B. Unintentional injury mortality: the role of criminal offending. A Swedish longitudinal population based study. *Int J Inj Contr Saf Promot*. 2014; 21:127–135. <https://doi.org/10.1080/17457300.2013.792281> PMID: 23638677
18. Borowsky IW, Ireland M, Resnick MD. Adolescent suicide attempts: risks and protectors. *Pediatrics*. 2001; 107:485–493. <https://doi.org/10.1542/peds.107.3.485> PMID: 11230587

19. Salzinger S, Rosario M, Feldman RS, Ng-Mak DS. Adolescent suicidal behavior: associations with pre-adolescent physical abuse and selected risk and protective factors. *J Am Acad Child Adolesc Psychiatry*. 2007; 46:859–866. <https://doi.org/10.1097/chi.0b013e318054e702> PMID: 17581450
20. Berman AL, Jobes DA, Silverman MM. Prevention. In: Berman AL, Jobes DA, Silverman MM, editors. *Adolescent suicide: assessment and intervention*. 2nd ed. Washington DC: American Psychological Association; 2006. p. 289–334.
21. Bridge JA, Goldstein TR, Brent DA. Adolescent suicide and suicidal behavior. *J Child Psychol Psychiatry*. 2006; 47:372–394. <https://doi.org/10.1111/j.1469-7610.2006.01615.x> PMID: 16492264
22. Turecki G, Brent DA. Suicide and suicidal behavior. *Lancet* 2016; 387(10024):1227–1239. [https://doi.org/10.1016/S0140-6736\(15\)00234-2](https://doi.org/10.1016/S0140-6736(15)00234-2) PMID: 26385066
23. Werbart Törnblom A, Sorjonen K, Runeson B, Rydelius PA. Life events and coping strategies among young people who died by suicide or sudden violent death. *Front Psychiatry*. 2021; 12:670246. <https://doi.org/10.3389/fpsy.2021.670246> PMID: 34512410
24. Kristensen P, Weisæth L, Heir T. Bereavement and mental health after sudden and violent losses: a review. *Psychiatry*; 2012; 75:76–97. <https://doi.org/10.1521/psyc.2012.75.1.76> PMID: 22397543
25. Werbart Törnblom A, Sorjonen K, Runeson B, Rydelius PA. Who is at risk of dying young from suicide and sudden violent death? Common and specific risk factors among children, adolescents and young adults. *Suicide Life Threat Behav*. 2020; 50:757–777. <https://doi.org/10.1111/sltb.12614> PMID: 32012342
26. Faul F, Erdfelder E, Buchner A, Lang AG. Statistical power analyses using G\*Power 3.1: tests for correlation and regression analyses. *Behav Res Methods*. 2009; 41:1149–1160. <https://doi.org/10.3758/BRM.41.4.1149> PMID: 19897823
27. Isometsä E. T. Psychological autopsy studies: a review. *Eur Psychiatry*. 2001; 16:379–385. [https://doi.org/10.1016/s0924-9338\(01\)00594-6](https://doi.org/10.1016/s0924-9338(01)00594-6) PMID: 11728849
28. American Psychiatric Association. *Diagnostic and statistical manual of mental disorders*. 4th ed., text rev. Washington, DC: APA; 2000.
29. Felitti VJ, Anda RF, Nordenberg D, Williamson DF, Spitz AM, Edwards V, et al. Relationship of childhood abuse and household dysfunction to many of the leading causes of death in adults: the Adverse Childhood Experiences (ACE) Study. *Am J Prev Med*. 1998; 14:245–58. [https://doi.org/10.1016/S0749-3797\(98\)00017-8](https://doi.org/10.1016/S0749-3797(98)00017-8) PMID: 9635069
30. Dube SR, Felitti VJ, Dong M, Chapman DP, Giles WH, Anda RF. Childhood abuse, neglect, and household dysfunction and the risk of illicit drug use: the adverse childhood experiences study. *Pediatrics*. 2003; 111:564–72 <https://doi.org/10.1542/peds.111.3.564> PMID: 12612237
31. Yeaworth RC, McNamee MJ, Pozehl B. The Adolescent Life Change Event Scale: its development and use. *Adolescence* 1992; 27:783–802. PMID: 1471559
32. Rahe RH, Arthur RJ. Life change and illness studies: past history and future directions. *J Human Stress*. 1978; 4:3–15. <https://doi.org/10.1080/0097840X.1978.9934972> PMID: 346993
33. Blasco-Fontecilla H, Delgado-Gomez D, Legido-Gil T, de Leon J, Perez-Rodriguez M, Baca-Garcia E. Can the Holmes-Rahe Social Readjustment Rating Scale (SRRS) be used as a suicide risk scale? An exploratory study. *Arch Suicide Res*. 2012; 16:13–28. <https://doi.org/10.1080/13811118.2012.640616> PMID: 22289025
34. Kato T. Frequently used coping scales: a meta-analysis. *Stress Health* 2015; 31:315–323. <https://doi.org/10.1002/smi.2557> PMID: 24338955
35. Schotte DE, Clum GA. Problem-solving skills in suicidal psychiatric patients. *J Consult Clin Psychol*. 1987; 55:49–54. <https://doi.org/10.1037//0022-006x.55.1.49> PMID: 3571658
36. Mann JJ, Waternaux C, Haas GL, Malone KM. Toward a clinical model of suicidal behavior in psychiatric patients. *Am J Psychiatry* 1999; 156:181–189. <https://doi.org/10.1176/ajp.156.2.181> PMID: 9989552
37. Apter A, Plutchik R, van Praag HM. Anxiety, impulsivity and depressed mood in relation to suicidal and violent behavior. *Acta Psychiatr Scand*. 1993; 87:1–5. <https://doi.org/10.1111/j.1600-0447.1993.tb03321.x> PMID: 8424318
38. Plutchik R. Outward and inward directed aggressiveness: the interaction between violence and suicidality. *Pharmacopsychiatry*. 1995; 28 Suppl 2:47–57. <https://doi.org/10.1055/s-2007-979620> PMID: 8614701
39. Nilsson T, Wallinius M, Gustavson C, Anckarsäter H, Kerekes N. Violent recidivism: a long-time follow-up study of mentally disordered offenders. *PLoS ONE* 2011; 6(10): e25768. <https://doi.org/10.1371/journal.pone.0025768> PMID: 22022445

40. Laporte N, Ozolins A, Westling S, Westrin Å, Billstedt E, Hofvander B, et al. (2017) Deliberate self-harm behavior among young violent offenders. *PLoS ONE* 2017; 12(8): e0182258. <https://doi.org/10.1371/journal.pone.0182258> PMID: 28817578
41. Han J, Batterham PJ, Calear AL, Randall R. Factors influencing professional help-seeking for suicidality: a systematic review. *Crisis* 2018; 39, 175–196. <https://doi.org/10.1027/0227-5910/a000485> PMID: 29052431
42. Hawton K, Appleby L, Platt S, Foster T, Cooper J, Malmberg A, et al. The psychological autopsy approach to studying suicide: a review of methodological issues. *J Affect Disord.* 1998; 50:269–276. [https://doi.org/10.1016/s0165-0327\(98\)00033-0](https://doi.org/10.1016/s0165-0327(98)00033-0) PMID: 9858086
43. Brent DA. The psychological autopsy: methodological considerations for the study of adolescent suicide. *Suicide Life Threat Behav.* 1989; 19:43–57. <https://doi.org/10.1111/j.1943-278x.1989.tb00365.x> PMID: 2652387
